# Supplementary material for: Mediator complex proximal Tail subunit MED30 is critical for Mediator core stability and cardiomyocyte transcriptional network
Source: PubMed Central journal article supplement (PMC8432849; doi:10.1371/journal.pgen.1009785), 2021-09-10
Supplement: pgen.1009785.s008.pdf [file pgen.1009785.s008.pdf]

## S1 Table. Genotyping primers

Genomic DNA was extracted from mouse tails as previously described (55) , and polymerase chain reaction (PCR) was used to genotype the offspring using the following gene-specific primers (from 5' to 3'):

| <b>Primer for PCR:</b> |                         |                        |
|------------------------|-------------------------|------------------------|
| <b>Gene</b>            | <b>Forward</b>          | <b>Reverse</b>         |
| Med30 floxed           | TTACCCCATACCTGGAAGACCT  | GACACTTCTAGCGGTAATGAGC |
| Tnnt-Cre               | GCACTCCAGCTTGGTTCCCGA   | TACTCAAGAACTACGGGCTGC  |
| $\alpha$ MHC-MerCreMer | GCCATAGGCTACGGTGTA AAAG | GTTGGTCAATAAGCCCATCATT |
