# Supplementary material for: Mediator complex proximal Tail subunit MED30 is critical for Mediator core stability and cardiomyocyte transcriptional network
Source: PubMed Central journal article supplement (PMC8432849; doi:10.1371/journal.pgen.1009785), 2021-09-10
Supplement: pgen.1009785.s009.pdf [file pgen.1009785.s009.pdf]

**S2 Table. List of qRT-PCR primers**

| Primer for qRT-PCR: |                          |                            |
|---------------------|--------------------------|----------------------------|
| Gene                | Forward                  | Reverse                    |
| Med30               | CGTGCAGGACATCGTGTACC     | CAGCTTTGTCCGGTCTT          |
| Mycn                | ACCATGCCGGGGATGATCT      | AGCATCTCCGTAGCCCAATTC      |
| Hey2                | AAGCGCCCTTGTGAGGAAAC     | GGTAGTTGTCCGGTGAATTGGAC    |
| Angpt1              | CACATAGGGTGCAGCAACCA     | CGTCGTGTTCTGGAAGAATGA      |
| Gja1                | ACAGCGGTTGAGTCAGCTTG     | GAGAGATGGGGAAGGACTTGT      |
| Gja5                | GGTCCACAAGCACTCCACAG     | CTGAATGGTATCGCACCCGAA      |
| Tnnt2               | CAGAGGAGGCCAACGTAGAAG    | CAGAGGAGGCCAACGTAGAAG      |
| Tnni2               | CGGAGGGTGCATGTCTG        | CAGGTCCCCTTCCTTCTCA        |
| Kcnh2               | GACACCATCATCCGCAAGTTT    | CAGAAGCCGTCTTTCAGTA        |
| Kcnip2              | GGATGAGTTTGAAGTATCCACGG  | GACAATTCCGCTGGGACATTC      |
| KcnJ3               | TGCGTGGCCAATGTCTATAA     | CAGGATGGACTGGAAGAGGA       |
| Cacna1c             | CCTGCTGGTGGTTAGCGTG      | TCTGCCTCCGTCTGTTTAGAA      |
| Scn4a               | AGTCCCTGGCAGCCATAGAA     | CCCATAGATGAGTGGGAGGTT      |
| Acadm               | AGGGTTTAGTTTTGAGTTGACGG  | CCCCGCTTTTGTTCATATTCCG     |
| Kcnk3               | ACGGAGGCAAGGTGTTCTG      | ACGACACGAAACCGATGAGC       |
| Abcc9               | CATAGCTCATCGGGTTCACAC    | ATGTCTGCACGGACAAACGA       |
| Acat1               | CAGGAAGTAAGATGCCTGGAAC   | TTCACCCCTTGGATGACATT       |
| Tnni3               | TCTGCCAACTACCGAGCCTAT    | CTCTTCTGCCTCTCGTTCCAT      |
| Pln                 | AAAGTGCAATACCTCACTCGC    | GGCATTTCATAGTGGAGGCTC      |
| Ryr2                | ACGGCGACCATCCACAAAG      | AAAGTCTGTTGCCAAATCCTTCT    |
| Casq1               | CTGGCACTGCTGTTTGTACTG    | GGGGGCTCATGGTAGAGGAG       |
| Tnnt1               | CCTGTGGTGCCTCCTTTGATT    | TGCGGTCTTTTAGTGCAATGAG     |
| Mhy7                | ACTGTCAACACTAAGAGGGTCA   | TTGGATGATTTGATCTTCCAGGG    |
| Atp2a2              | TGGAACAACCCGGTAAAGAGT    | CACCAGGGGCATAATGAGCAG      |
| Mhy6                | GCCAGTACCTCCGAAAGTC      | GCCTTAACATACTCCTCCTTGTC    |
| Myom2               | AAAAGACACAAGCACTTTGACCA  | TGGGAGGATGACTGGGTGG        |
| Rrad                | GTCAGAGGAGGGCGTTTACAA    | TCCACAGTGATAGAACGGTCA      |
| Bckdhb              | AGCTATTGCGGAAATCCAGTTT   | ACAGTTGAAAAGATCACCTGAGC    |
| Ucp3                | CTGCACCGCCAGATGAGTTT     | ATCATGGCTTGAAATCGGACC      |
| Myoz2               | GCATCAGCCATCACGAAGGAA    | CCACGATTACTGAAATGGGACA     |
| Cox10               | AGAAGAGCTATACAGGGATTGCC  | CTGTGTGACATACATGCGCTT      |
| Ndufaf4             | CACCGGAGTCAGTATCCAGAA    | GGTTCACTTTTACCGGCAAGG      |
| Sdhd                | AATTTGCCATTTACCGATGGGA   | AGCATCCAACACCATAGGTCC      |
| Pdk2                | AGGGGCACCCAAGTACATC      | TGCCGGAGGAAAGTGAATGAC      |
| Uqc1                | AGTCCGAATGAAGCAGGAAG     | GGGATTAACCCCATGACTC        |
| Slc25a13            | CAGCCCAACCCGAAAAGTGT     | CTGGAACGCCACCATAAACAA      |
| Lrrc10              | CGACCGCTGCCAGAGTTATG     | GTTGTCGCTGAGGTAGAGCTT      |
| Tnnt2               | CAGAGGAGGCCAACGTAGAAG    | CTCCATCGGGGATCTTGGGT       |
| ANF                 | GATAGATGAAGGCAGGAAGCCGC  | AGGATTGGAGCCCAGAGTGGACTAGG |
| BNP                 | TGTTTCTGCTTTTCTTTATCTGTC | CTCCGACTTTTCTTTATCAGCTC    |
| 18s                 | GGAAGGGCACCAACAGGAGT     | TGCAGCCCCGGACATCTAAG       |
