# Supplementary material for: Mediator complex proximal Tail subunit MED30 is critical for Mediator core stability and cardiomyocyte transcriptional network
Source: PubMed Central journal article supplement (PMC8432849; doi:10.1371/journal.pgen.1009785), 2021-09-10
Supplement: pgen.1009785.s010.pdf [file pgen.1009785.s010.pdf]

### S3 Table. List of Antibodies

| Antibody                | Source, Cat. No                        | Antibody                                        | Source, Cat. No                  |
|-------------------------|----------------------------------------|-------------------------------------------------|----------------------------------|
| donkey anti-rabbit A488 | Thermo Fisher Scientific, A21206       | goat anti-chicken A488                          | Thermo Fisher Scientific, A11039 |
| donkey anti-rabbit A647 | Thermo Fisher Scientific, A31573       | donkey anti-rabbit A546                         | Thermo Fisher Scientific, A10040 |
| donkey anti-goat A546   | Thermo Fisher Scientific, A11056       | donkey anti-mouse A546                          | Thermo Fisher Scientific, A10036 |
| donkey anti-mouse A647  | Thermo Fisher Scientific, A31571       | Anti-Sarcomeric Alpha Actinin-RABBIT Monoclonal | Abcam, ab68167                   |
| RYR2                    | AbClonal, A0298                        | NKX2.5                                          | Santa Cruz Biotech, sc-8697      |
| MED30                   | Made from Dr. Thomas G. Boyer lab (35) | GAPDH                                           | Santa Cruz, sc-32233             |
| ATP2A2 / SERCA2         | AbClonal, A1097                        | MED14 (CRSP2/DRIP150)                           | Bethyl, A301-044A                |
| MED31                   | Proteintech, 16590-1-AP                | MED8                                            | Proteintech, 12182-1-AP          |
| MED29                   | Abcam, ab177451                        | MED1                                            | Bethyl                           |
| MED6                    | Proteintech, 15338-1-AP                | MED20                                           | Proteintech, 17598-1-AP          |
| MED23/CRSP3             | Bethyl, A300-425A-T                    | MED16                                           | Bethyl, A303-668A-T              |
| MED17                   | Life tech, PA530314                    | MED18                                           | Bethyl, A300-777A                |
| MED12                   | Bethyl, A300-774A                      | MED15                                           | Bethyl, A301-278A-T              |
| TRAP100/MED24           | Bethyl, A301-472A                      | THRAP1/MED13                                    | Bethyl, A301-278A-T              |
| MED4                    | Made from Dr. Thomas G. Boyer lab (35) | KCNJ3                                           | Alomone labs, APC-005            |
| SCN4A                   | Alomone labs, ASC-020                  | CASQ1                                           | Santa Cruz, sc-28274             |
| CACNA1C                 | Alomone labs, ACC-003                  |                                                 |                                  |
